# Supplementary material for: Unusual photophysical properties of conjugated, alternating indigo–fluorene copolymers
Source: Royal Society of Chemistry journal article supplement (doi:10.1039/c4ta06272h), 2015-01-01
Supplement: c4ta06272h1.pdf [file c4ta06272h1.pdf]

## Supporting Information

# Unusual photophysical properties of conjugated, alternating indigo-fluorene copolymers

João Pina<sup>a)</sup>, J. Sérgio Seixas de Melo <sup>a)</sup>, Anika Eckert <sup>b)</sup>, Ullrich  
Scherf<sup>b)</sup>

*a) Coimbra Chemistry Centre, Department of Chemistry, University of Coimbra, Rua  
Larga, 3004-535 Coimbra, Portugal*

*b) Makromolekulare Chemie, Bergische Universität Wuppertal, Gaußstraße 20, 42097  
Wuppertal, Germany*

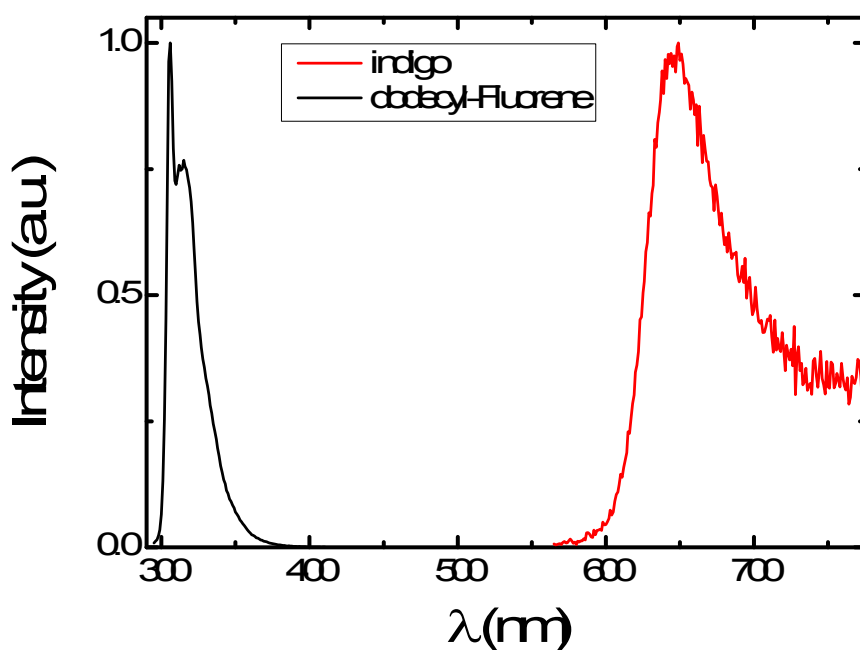

Figure S1: Normalized fluorescence emission spectra of 9,9-bis(dodecyl)fluorene and indigo in dioxane solution at room temperature.

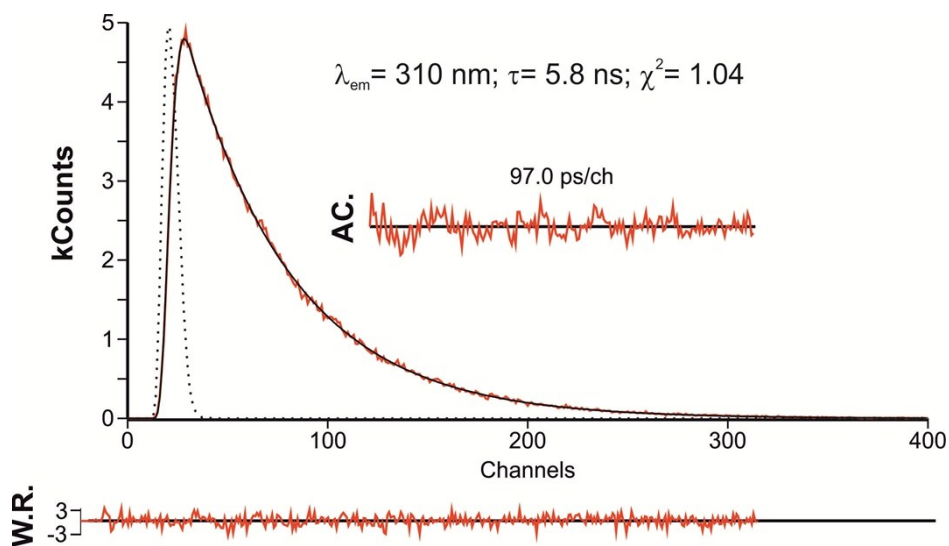

Figure S2: Room temperature fluorescence decay for 9,9-bis(dodecyl)fluorene obtained with  $\lambda_{exc} = 282$  nm and collected at  $\lambda_{em} = 310$  nm in dioxane solution. For a better judgment of the quality of the fits, weighted residuals (W.R.), autocorrelation function (A.C.) and  $\chi^2$  value are also presented. The dashed line in the decay is the instrumental response function.

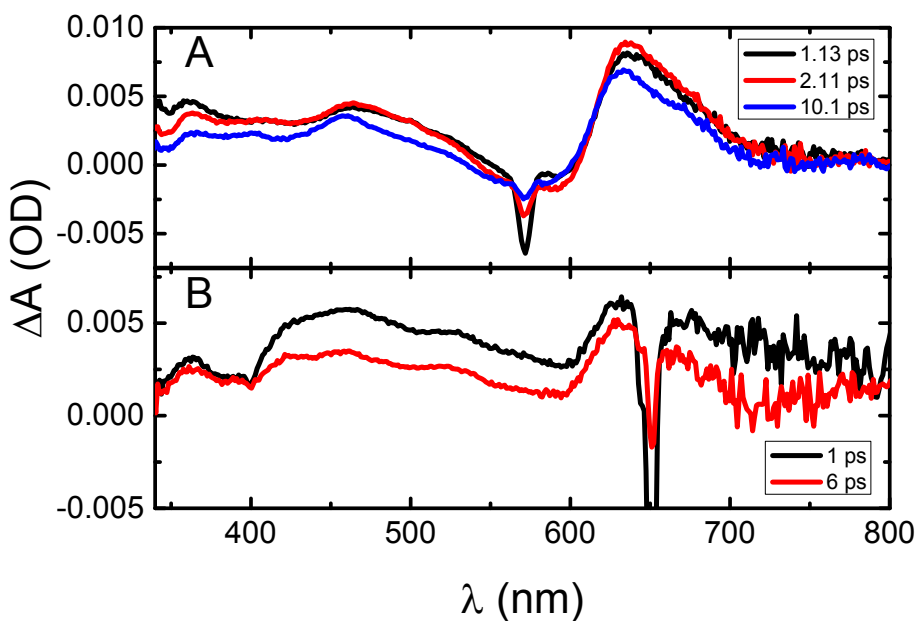

Figure S3: Femtosecond transient absorption difference spectra for indigo in dioxane solution collected at different time delays (excitation at (A) 285 nm and (B) 325nm).

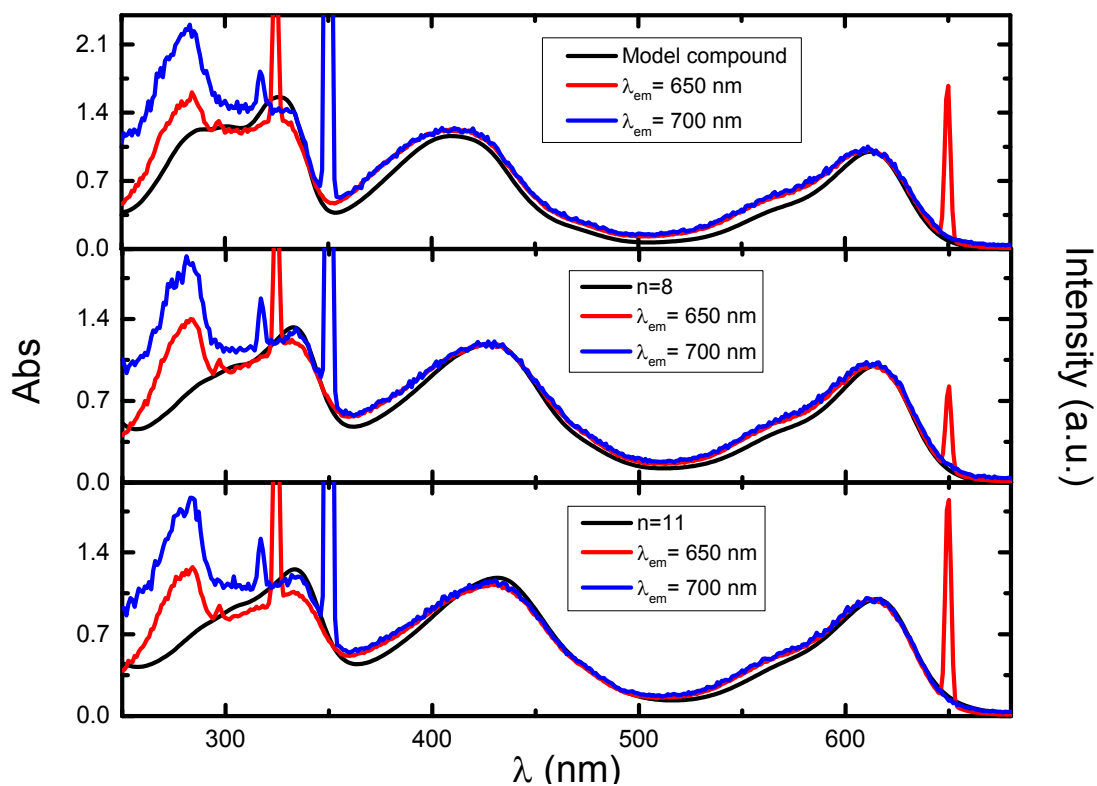

Figure S4: Absorption (black lines) and (normalized) fluorescence excitation (red and blue lines) spectra for the two copolymer fractions with  $n=8$  and  $n=11$ , respectively, and the fluorene-indigo-fluorene trimer in dioxane solution at 293 K.
